# Supplementary material for: Collecting and Analyzing Patient Experiences of Health Care From Social Media
Source: PubMed Central journal article supplement (PMC4526973; doi:10.2196/resprot.3433), 2015-07-02
Supplement: resprot_v4i3e78_app1.pdf [file resprot_v4i3e78_app1.pdf]

|                                 |                       |
|---------------------------------|-----------------------|
| Hospitals                       | General Dentistry     |
| Urgent Care                     | Chiropractors         |
| Health and Medical              | Physical Therapy      |
| Medical Centers                 | Eyewear and Opticians |
| Obstetricians and Gynecologists | Optometrists          |
| Sports Medicine                 | Ophthalmologists      |
| Orthopedists                    | Periodontists         |
| Doctors                         | Dentists              |
| Family Practice                 | Oral Surgeons         |
| Allergists                      | Massage               |
| Internal Medicine               | Massage Therapy       |
| Pediatricians                   | Naturopathic/Holistic |
| Laser Eye Surgery/Lasik         | Acupuncture           |
